# Supplementary material
Source: publisher figshare collection journal article supplement (https://sage.figshare.com/ndownloader/files/15006290)
Supplement: Supplementary file 1 [file 15006290]

**Supplementary table:** Exploratory bivariate analysis of the socio-demographic characteristics, social environmental factors and program exposure among participants in the ASPIRE-Romania smoking prevention program

| Variables                             |                                  | Low<br>program<br>exposure<br>(%) | High<br>program<br>exposure<br>(%) | p-value |
|---------------------------------------|----------------------------------|-----------------------------------|------------------------------------|---------|
| Socio-demographic factors             |                                  |                                   |                                    |         |
| Sex                                   | Girl                             | 30.20%                            | 69.80%                             | 0.409   |
|                                       | Boy                              | 33.10%                            | 66.90%                             |         |
| Ethnicity                             | Romanian ethnicity               | 32.60%                            | 67.40%                             | 0.574   |
|                                       | Other ethnicity                  | 30.60%                            | 69.40%                             |         |
| Factors related to school             |                                  |                                   |                                    |         |
| School prestige                       | More prestigious school          | 32.50%                            | 67.50%                             | 0.647   |
|                                       | Less prestigious school          | 30.80%                            | 69.20%                             |         |
| Grades                                | High grades                      | 30.50%                            | 69.50%                             | 0.286   |
|                                       | Low grades                       | 34.70%                            | 65.30%                             |         |
| Punishment for bad behavior in school | No punishment                    | 30.40%                            | 69.60%                             | 0.048*  |
|                                       | At least one warning, suspension | 41.60%                            | 58.40%                             |         |
| Psychological factors                 |                                  |                                   |                                    |         |
| Sensation seeking score               | High                             | 30.80%                            | 69.20%                             | 0.248   |
|                                       | Low                              | 36.60%                            | 63.40%                             |         |
| Depression symptoms score             | High                             | 37.50%                            | 62.50%                             | 0.011*  |
|                                       | Low                              | 28.10%                            | 71.90%                             |         |
| Factors related to family and friends |                                  |                                   |                                    |         |
| Parents' marital status               | Married                          | 30.90%                            | 69.10%                             | 0.28    |
|                                       | Divorced/separated               | 36.50%                            | 63.50%                             |         |
| Father's level of education           | Low                              | 29.10%                            | 70.90%                             | 0.031*  |
|                                       | High                             | 37.40%                            | 62.60%                             |         |
| Mother's level of education           | Low                              | 29.10%                            | 70.90%                             | 0.058   |
|                                       | High                             | 36.20%                            | 63.80%                             |         |
| Number of people living in the home   | Less than 6                      | 31.60%                            | 68.40%                             | 0.837   |
|                                       | 6 or more                        | 33.30%                            | 66.70%                             |         |
| Father's smoking status               | Nonsmoker                        | 32.00%                            | 68.00%                             | 0.835   |
|                                       | Smoker                           | 31.30%                            | 68.70%                             |         |
| Mother's smoking status               | Nonsmoker                        | 32.00%                            | 68.00%                             | 0.829   |
|                                       | Smoker                           | 31.30%                            | 68.70%                             |         |

|                                                              |                         |         |        |           |
|--------------------------------------------------------------|-------------------------|---------|--------|-----------|
|                                                              | Smoker                  | 31.20%  | 68.80% |           |
| Brother(s)' smoking status                                   |                         |         |        |           |
|                                                              | Nonsmoker               | 29.30%  | 70.70% |           |
|                                                              | Smoker                  | 44.40%  | 55.60% | 0.002*    |
| Other people smoking in the home                             |                         |         |        |           |
|                                                              | No                      | 30.90%  | 69.10% |           |
|                                                              | Yes                     | 33.00%  | 67.00% | 0.566     |
| Parents talked about dangers of smoking                      |                         |         |        |           |
|                                                              | Often                   | 31.00%  | 69.00% |           |
|                                                              | Rarely or never         | 31.90%  | 68.10% | 0.822     |
| Friends' smoking status                                      |                         |         |        |           |
|                                                              | Less than half smoke    | 29.80%  | 70.20% |           |
|                                                              | More than half smoke    | 39.80%  | 60.20% | 0.028*    |
| Close friends' smoking status                                |                         |         |        |           |
|                                                              | None is smoking         | 26.40%  | 73.60% |           |
|                                                              | At least one is smoking | 34.00%  | 66.00% | 0.052     |
| <b>Smoking behavior</b>                                      |                         |         |        |           |
| Ever tried smoking (conventional cigarettes)                 |                         |         |        |           |
|                                                              | No                      | 27.30%  | 72.70% |           |
|                                                              | Yes                     | 37.20%  | 62.80% | 0.006*    |
| Ever tried e-cigarettes                                      |                         |         |        |           |
|                                                              | No                      | 27.10%  | 72.90% |           |
|                                                              | Yes                     | 40.60%  | 59.40% | <0.0001** |
| Ever tried cigar                                             |                         |         |        |           |
|                                                              | No                      | 30.50%  | 69.50% |           |
|                                                              | Yes                     | 34.50%  | 65.50% | 0.313     |
| Ever tried pipe                                              |                         |         |        |           |
|                                                              | No                      | 31.60%  | 68.40% |           |
|                                                              | Yes                     | 34.60%  | 65.40% | 0.745     |
| Ever tried hooka                                             |                         |         |        |           |
|                                                              | No                      | 32.10%  | 67.90% |           |
|                                                              | Yes                     | 29.90%  | 70.10% | 0.632     |
| Ever tried chewing tobacco                                   |                         |         |        |           |
|                                                              | No                      | 31.80%  | 68.20% |           |
|                                                              | Yes                     | 20.00%  | 80.00% | 0.572     |
| Ever tried snus                                              |                         |         |        |           |
|                                                              | No                      | 31.10%  | 68.90% |           |
|                                                              | Yes                     | 50.00%  | 50.00% | 0.074     |
| Ever tried snuff                                             |                         |         |        |           |
|                                                              | No                      | 31.50%  | 68.50% |           |
|                                                              | Yes                     | 100.00% | 0.00%  | 0,1       |
| Smoked during the last 30 days                               |                         |         |        |           |
|                                                              | No                      | 30.00%  | 70.00% |           |
|                                                              | Yes                     | 38.50%  | 61.50% | 0.057     |
| <b>Reasons for smoking/not smoking (decisional balance)</b>  |                         |         |        |           |
| Smoking makes kids get more respect from others (social pro) |                         |         |        |           |
|                                                              | Not important           | 31.30%  | 68.70% |           |
|                                                              | Important               | 38.50%  | 61.50% | 0.35      |
| Kids who smoke have more friends (social pro)                |                         |         |        |           |
|                                                              | Not important           | 31.20%  | 68.80% | 0.396     |

|                                                                 |               |        |        |              |
|-----------------------------------------------------------------|---------------|--------|--------|--------------|
|                                                                 | Important     | 36.00% | 64.00% |              |
| Kids who smoke go out more on dates (social pro)                | Not important | 31.60% | 68.40% | 0.902        |
|                                                                 | Important     | 32.30% | 67.70% |              |
| Smoking helps people cope better with frustrations (coping pro) | Not important | 31.60% | 68.40% | 0.936        |
|                                                                 | Important     | 32.00% | 68.00% |              |
| Smoking cigarettes is pleasurable (coping pro)                  | Not important | 31.10% | 68.90% | 0.399        |
|                                                                 | Important     | 35.60% | 64.40% |              |
| Smoking cigarettes relieves tension (coping pro)                | Not important | 31.60% | 68.40% | 0.956        |
|                                                                 | Important     | 31.90% | 68.10% |              |
| Cigarette smoke stinks (con)                                    | Not important | 32.70% | 67.30% | 0.74         |
|                                                                 | Important     | 31.40% | 68.60% |              |
| Cigarette smoking can affect the health of others (con)         | Not important | 50.60% | 49.40% | <0.0001**    |
|                                                                 | Important     | 28.90% | 71.10% |              |
| Smoking cigarettes is hazardous to people's health (con)        | Not important | 46.20% | 53.80% | <b>0.008</b> |
|                                                                 | Important     | 30.20% | 69.80% |              |
| Cigarette smoke bothers other people (con)                      | Not important | 45.60% | 54.40% | 0.002*       |
|                                                                 | Important     | 29.60% | 70.40% |              |
| Cigarette smoking is a messy habit (con)                        | Not important | 30.80% | 69.20% | 0.751        |
|                                                                 | Important     | 32.00% | 68.00% |              |
| Cigarette smoking makes teeth yellow (con)                      | Not important | 38.60% | 61.40% | 0.134        |
|                                                                 | Important     | 30.70% | 69.30% |              |
| Smoking is too expensive.                                       | Not important | 39.60% | 60.40% | 0.025*       |
|                                                                 | Important     | 29.70% | 70.30% |              |
| Cigarette smoking is addictive.                                 | Not important | 45.10% | 54.90% | 0.003*       |
|                                                                 | Important     | 29.60% | 70.40% |              |
| Cigarette smoking helps you lose weight.                        | Not important | 31.00% | 69.00% | 0.51         |
|                                                                 | Important     | 33.70% | 66.30% |              |
| Smoking cigarettes makes you bad at sports.                     | Not important | 40.50% | 59.50% | 0.022*       |
|                                                                 | Important     | 29.80% | 70.20% |              |
| Most people in today's society think badly about smoking.       | Not important | 35.80% | 64.20% | 0.134        |
|                                                                 | Important     | 29.90% | 70.10% |              |

\* p-values significant at 0.05; \*\* p-values significant at 0.001 (after applying Bonferroni correction)
